# Supplementary material for: Effectiveness of Protective Measures and Rules in Reducing the Incidence of Injuries in Combat Sports: A Scoping Review
Source: MDPI journal article supplement (doi:10.3390/jfmk8040150), 2023-10-30
Supplement: s1 [file s1]

Table S1. Data Sources

| databases      | Search Terms                                                                                                                                                                                                                                                |
|----------------|-------------------------------------------------------------------------------------------------------------------------------------------------------------------------------------------------------------------------------------------------------------|
| PubMed         | <p>Example search: Title/abstract – (combat sport OR martial arts OR Protective meatures OR rules OR protectors) AND (injuries OR injury incidence rate OR risk of injuries)</p> <p>Limited to: Date from 2010 to 10th June 2023</p>                        |
| Web of Science | <p>Example search: Topic – (ALL combat sport OR ALL martial arts OR ALL Protective meatures OR ALL rules OR ALL protectors) AND (ALL injuries OR ALL injury incidence rate OR ALL risk of injuries)</p> <p>Limited to: Date from 2010 to 10th June 2023</p> |
| Scopus         | <p>Example search: Topic – (“combat sport” OR “martial arts” OR “Protective meatures” OR “rules” OR “protectors”) AND (“injuries” OR “injury incidence rate” OR “risk of injuries”)</p> <p>Limited to: Date from 2010 to 10th June 2023</p>                 |
